# Supplementary material for: Multisite medical record review of emergency department visits for unspecified injury of head following the ICD-10-CM coding transition
Source: PubMed Central journal article supplement — Inj Prev. 2021 Mar 4;27(Suppl 1):i13–8. doi: 10.1136/injuryprev-2019-043517 (PMC7948189; doi:10.1136/injuryprev-2019-043517), 2021-03-04
Supplement: injuryprev-2019-043517supp001.pdf [file injuryprev-2019-043517supp001.pdf]

Confidential

Page 2

**Within the medical record, was there mention of the following signs and/or symptoms by anyone?**

|                                                                                                                                                                                                                  | No                    | Yes, known            | Yes, suspected        | No documentation      |
|------------------------------------------------------------------------------------------------------------------------------------------------------------------------------------------------------------------|-----------------------|-----------------------|-----------------------|-----------------------|
| Change in the child's normal pattern of eating, drinking or nursing                                                                                                                                              | <input type="radio"/> | <input type="radio"/> | <input type="radio"/> | <input type="radio"/> |
| Change in the child's normal interest in enjoyable activities                                                                                                                                                    | <input type="radio"/> | <input type="radio"/> | <input type="radio"/> | <input type="radio"/> |
| Dazed, foggy, confused, disoriented, or not able to think clearly                                                                                                                                                | <input type="radio"/> | <input type="radio"/> | <input type="radio"/> | <input type="radio"/> |
| Difficulty remembering what happened just before or after the injury event, difficulty recognizing people or places or learning new things                                                                       | <input type="radio"/> | <input type="radio"/> | <input type="radio"/> | <input type="radio"/> |
| Loss of consciousness (also referred to as syncope or fainting)                                                                                                                                                  | <input type="radio"/> | <input type="radio"/> | <input type="radio"/> | <input type="radio"/> |
| Nausea or vomiting that occurred early on following the injury event                                                                                                                                             | <input type="radio"/> | <input type="radio"/> | <input type="radio"/> | <input type="radio"/> |
| Headache including pain or feeling pressure in the head subsequent to injury event                                                                                                                               | <input type="radio"/> | <input type="radio"/> | <input type="radio"/> | <input type="radio"/> |
| Dizzy, uncoordinated, had poor balance, was stumbling around, was moving more slowly than usual, or had imbalance on gait testing (e.g., tandem walk ability normal/able vs abnormal; speed normal vs decreased) | <input type="radio"/> | <input type="radio"/> | <input type="radio"/> | <input type="radio"/> |
| Blurred vision, double vision, or decreased vision as compared to pre-injury state                                                                                                                               | <input type="radio"/> | <input type="radio"/> | <input type="radio"/> | <input type="radio"/> |
| Difficulty concentrating or easily distractable                                                                                                                                                                  | <input type="radio"/> | <input type="radio"/> | <input type="radio"/> | <input type="radio"/> |
| Sensitivity to noise or light (Noise or light are disturbing or painful to the patient)                                                                                                                          | <input type="radio"/> | <input type="radio"/> | <input type="radio"/> | <input type="radio"/> |
| Change in mood or personality such as irritability, nervousness, anxiety, feeling more or less emotional or sad, or feeling more bothered by things                                                              | <input type="radio"/> | <input type="radio"/> | <input type="radio"/> | <input type="radio"/> |

## Confidential

Page 3

|                                                                                                            |                       |                       |                       |                       |
|------------------------------------------------------------------------------------------------------------|-----------------------|-----------------------|-----------------------|-----------------------|
| Difficulty falling asleep, more drowsy than usual, or sleep quantity is noticeably more or less than usual | <input type="radio"/> | <input type="radio"/> | <input type="radio"/> | <input type="radio"/> |
| Slurred speech, inability to speak (aphasia) or other speech problem                                       | <input type="radio"/> | <input type="radio"/> | <input type="radio"/> | <input type="radio"/> |
| Ringing in the ears (tinnitus) or other change in hearing                                                  | <input type="radio"/> | <input type="radio"/> | <input type="radio"/> | <input type="radio"/> |
| Motor or sensory loss including weakness, numbness or tingling                                             | <input type="radio"/> | <input type="radio"/> | <input type="radio"/> | <input type="radio"/> |

---

Any signs of alcohol or drug intoxication noted

- No: No signs of alcohol/drug use or intoxication are report or observed  
 Yes, known: Documentation indicates alcohol/drug use associated with event, either by observation or positive laboratory testing  
 Yes, suspected: Documentation indicates suspicion of alcohol/drug use associated with event but not confirmed  
 No documentation: No documentation of alcohol/drug use associated with event

---

Any documentation in the record regarding alcohol/drug use or intoxication  
(Free text field for documentation of blood alcohol level, toxicology screen, alcohol on the breath, needle track marks, etc)

---

Dementia listed in patient history or by caregiver/family member report

- No: Patient/informant denies any form of dementia  
 Yes, known: Documentation or report of dementia in some form  
 Yes, suspected: Documentation or report of suspicion of dementia  
 No documentation: No documentation of dementia in any form

---

Any documentation in the record regarding dementia  
(Free text field for documentation of dementia)

---

Documentation of whether or not CT imaging of head was performed  Yes  
 No

---

Documentation of whether or not contrast medium was used with CT imaging  Yes  
 No

---

Documentation of whether or not MRI imaging of head was performed  Yes  
 No

---

Documentation of whether or not contrast medium was used with MRI imaging  Yes  
 No

Confidential

Page 4

---

Documentation of whether or not x-ray of head was performed  Yes  
 No

---

If positive results are noted on imaging, document the radiologist's impression verbatim (If imaging was normal, leave blank. If more than one imaging technique was used, document which technique the radiologist's impression addresses)

---

Documentation of any other potential TBI-related signs or symptoms  Yes  
 No

---

Specify other TBI-related symptoms  
(Other symptoms include objective findings documented by physician and might include, but are not limited to restlessness, combativeness, biting, dilation of one or both pupils, clear fluids draining from the nose or ears, penetrating brain injury, seizures/convulsions, paralysis)

---

Documentation of an assessment of TBI with any type of symptom inventory  
(Do not count review of systems (ROS) or Glasgow Coma Scale (GCS) as symptom inventories. Inventories may include but are not limited to: Post-Concussion Symptom Scale (PCSS), Health and Behavior Inventory (HBI), Post-Concussion Symptom Inventory (PCSI), Acute Concussion Evaluation (ACE))

Yes  No

---

List the symptom inventories used  
(Inventories may include but are not limited to: Post-Concussion Symptom Scale (PCSS), Health and Behavior Inventory (HBI), Post-Concussion Symptom Inventory (PCSI), Acute Concussion Evaluation (ACE))

---

TBI, concussion or similar diagnosis documented in the ED physician's note  No  
 Yes, known  
 Yes, suspected

---

Document verbatim how this was described in the ED physician's note

---

Based on complete record review, reviewer's assessment is

- TBI  
 Probable TBI  
 Possible TBI  
 No TBI
- 

Reviewer comments  
(List any other concerns that the reviewer discovers during the review process)

*Confidential*

Page 5

---

Date of review

---
